# Supplementary material for: Percolation transition of cooperative mutational effects in colorectal tumorigenesis
Source: PubMed Central journal article supplement (PMC5668266; doi:10.1038/s41467-017-01171-6), 2017-11-02
Supplement: 41467_2017_1171_MOESM3_ESM.pdf [file 41467_2017_1171_MOESM3_ESM.pdf]

## Description of Additional Supplementary Files

File Name: Supplementary Data 1

Description: **Hallmark gene sets of each factor for different predefined factor numbers.**

File Name: Supplementary Data 2

Description: **Patient information including tumor stages, CMS, and MSI status.** We obtained tumor stage and MSI information from the cBioPortal website and CMS information from the Colorectal Cancer Subtype Consortium (CRCSC) website (<https://www.synapse.org/#!Synapse:syn4978511.1>). NOLBL means that the patient is not classified as any CMS type.
